# Supplementary material for: AHNAK2 is a biomarker and a potential therapeutic target of adenocarcinomas: AHNAK2 is a biomarker for adenocarcinomas
Source: PubMed Central journal article supplement (PMC9828698; doi:10.3724/abbs.2022112), 2022-08-19
Supplement: 22074supplementary_TableS1.pdf [file 22074supplementary_TableS1.pdf]

**Supplementary Table S1. The genes and expressions of cervical cancer of TCGA database**

| <b>gene</b>   | <b>cor</b>     | <b>gene</b> | <b>cor</b> | <b>gene</b> | <b>cor</b> | <b>gene</b> | <b>cor</b> | <b>gene</b> |
|---------------|----------------|-------------|------------|-------------|------------|-------------|------------|-------------|
| SDR9C7        | 0.75577        | CYP4F22     | 0.60084    | ADGRF4      | 0.53942    | PLA2G4F     | 0.48519    | SPAG17      |
| FAM83G        | 0.73597        | CAMSAP1     | 0.59433    | GCOM1       | 0.53774    | KRT80       | 0.48322    | HRNR        |
| CERS3         | 0.72082        | BTBD11      | 0.59335    | KRTDAP      | 0.53763    | LGALS7B     | 0.48265    | FLG2        |
| RNF222        | 0.71143        | THEM5       | 0.58687    | BPIFC       | 0.53184    | CCDC85C     | 0.47352    | FAM46B      |
| SLC5A10       | 0.71098        | TMPRSS1     | 0.5833     | TMEM184     | 0.53026    | LYPD5       | 0.47261    | MAL2        |
| FAM83C        | 0.6794         | GSDMA       | 0.57566    | EHBP1L1     | 0.52266    | ARHGEF3     | 0.47195    | DHRS1       |
| DENND2C       | 0.67939        | FRMD6       | 0.57314    | WDFY2       | 0.51568    | LUZP6       | 0.47089    | ANKRD35     |
| TOM1L2        | 0.67572        | NIPAL4      | 0.57247    | WFDC12      | 0.51351    | MAB21L3     | 0.46769    | SPRR4       |
| TMEM154       | 0.66624        | KPRP        | 0.57181    | IFFO2       | 0.51145    | TM4SF19     | 0.46446    | TINCR       |
| A2ML1         | 0.66237        | BNIP1       | 0.56907    | LIPN        | 0.50988    | TMPRSS1     | 0.45976    | SOWAHB      |
| FAM83B        | 0.65661        | LCE3E       | 0.56598    | SH3RF2      | 0.50742    | MBOAT2      | 0.45971    | SLC25A4     |
| CYSRT1        | 0.64499        | ARAP2       | 0.56361    | MAST4       | 0.50337    | OTOP3       | 0.45865    | RAET1L      |
| PGLYRP3       | 0.64297        | SDR16C5     | 0.56351    | FAM25BP     | 0.50276    | TMPRSS1     | 0.45679    | KCTD11      |
| RDH12         | 0.63064        | NIPAL1      | 0.55613    | WFDC5       | 0.5005     | CCDC64E     | 0.45381    | LCE3A       |
| RAET1E        | 0.6304         | ACER1       | 0.55137    | LINC0158    | 0.49897    | S100A7A     | 0.45122    | C12ORF7     |
| <b>AHNAK2</b> | <b>0.61457</b> | DEFB103     | 0.5481     | C10ORF9     | 0.49867    | PROM2       | 0.45037    | HEPHL1      |
| C1ORF177      | 0.61388        | KRT78       | 0.54698    | LIPK        | 0.49849    | USH1G       | 0.45021    | LCE6A       |
| LINC00696     | 0.61306        | LANCL3      | 0.54498    | C15ORF6     | 0.49316    | TPRG1       | 0.44936    | DYNAP       |
| PLA2G4E       | 0.60298        | PHLDB3      | 0.5448     | TCAF2       | 0.48565    | AKR1B15     | 0.44856    | LCE2C       |
| SLC10A6       | 0.60165        | CPEB2       | 0.53947    | VSIG10L     | 0.48548    | ADGRF2      | 0.44832    | LCE2D       |

| <b>cor</b> | <b>gene</b> | <b>cor</b> | <b>gene</b> | <b>cor</b> |
|------------|-------------|------------|-------------|------------|
| 0.44801    | LINC0095    | 0.38576    | ZNF276      | 0.3386     |
| 0.44756    | TTC39B      | 0.3835     | GJB4        | 0.33722    |
| 0.43845    | DCUN1D3     | 0.37649    | LINC0052    | 0.33712    |
| 0.42728    | ASPG        | 0.37605    | FABP12      | 0.32757    |
| 0.42329    | CYP27C1     | 0.37482    | MUC21       | 0.3199     |
| 0.41955    | PNPLA1      | 0.37398    | LINC0059    | 0.31704    |
| 0.41718    | LCE1A       | 0.37173    | CD164L2     | 0.30212    |
| 0.41318    | TRIML1      | 0.36846    | RPTN        | 0.30093    |
| 0.41297    | GPR153      | 0.36777    | RP1L1       | 0.29617    |
| 0.40844    | OTOP2       | 0.36611    | ATG9B       | 0.29206    |
| 0.40788    | PLEKHA7     | 0.36415    | CTXN3       | 0.28898    |
| 0.40586    | ZBTB7C      | 0.35619    | FAM92A1     | -0.31813   |
| 0.40441    | CLLU1       | 0.3548     | GPX8        | -0.40538   |
| 0.40017    | FAM89A      | 0.35191    | TMEM136     | -0.41254   |
| -0.48028   | B3GNT8      | 0.35055    | LINC0009    | -0.42278   |
| 0.39658    | CPNE8       | 0.34807    |             |            |
| 0.39381    | PRIMA1      | 0.34678    |             |            |
| 0.3914     | TMPRSS1     | 0.34601    |             |            |
| 0.39115    | RTKN2       | 0.34169    |             |            |
| 0.38725    | FAM102A     | 0.33875    |             |            |
