# Supplementary material for: AHNAK2 is a biomarker and a potential therapeutic target of adenocarcinomas: AHNAK2 is a biomarker for adenocarcinomas
Source: PubMed Central journal article supplement (PMC9828698; doi:10.3724/abbs.2022112), 2022-08-19
Supplement: 22074supplementary_TableS2.pdf [file 22074supplementary_TableS2.pdf]

**Supplementary Table S2. The results of GSEA of HeLa and MDA-MB-231**

|          | ID       | Description                              | setSize | enrichmen |
|----------|----------|------------------------------------------|---------|-----------|
| hsa04740 | hsa04740 | Olfactory transduction                   | 433     | 0.423775  |
| hsa04630 | hsa04630 | JAK-STAT signaling pathway               | 162     | 0.498806  |
| hsa00040 | hsa00040 | Pentose and glucuronate interconversions | 33      | -0.77768  |
| hsa04380 | hsa04380 | Osteoclast differentiation               | 126     | 0.509432  |
| hsa04975 | hsa04975 | Fat digestion and absorption             | 43      | -0.7174   |
| hsa04060 | hsa04060 | Cytokine-cytokine receptor interaction   | 292     | 0.422615  |
| hsa03030 | hsa03030 | DNA replication                          | 36      | -0.73174  |
| hsa04976 | hsa04976 | Bile secretion                           | 89      | -0.59884  |
| hsa03440 | hsa03440 | Homologous recombination                 | 37      | -0.71148  |
| hsa04621 | hsa04621 | NOD-like receptor signaling pathway      | 182     | 0.454697  |
| hsa03320 | hsa03320 | PPAR signaling pathway                   | 74      | -0.59618  |
| hsa04064 | hsa04064 | NF-kappa B signaling pathway             | 102     | 0.506864  |

| NES      | pvalue   | p.adjust | qvalues  | rank |
|----------|----------|----------|----------|------|
| 1.257691 | 0.00734  | 0.504798 | 0.501497 | 3528 |
| 1.356205 | 0.007858 | 0.504798 | 0.501497 | 5299 |
| -1.54635 | 0.009674 | 0.504798 | 0.501497 | 850  |
| 1.35819  | 0.009991 | 0.504798 | 0.501497 | 5837 |
| -1.50125 | 0.011538 | 0.504798 | 0.501497 | 1138 |
| 1.213938 | 0.016509 | 0.55799  | 0.554341 | 3814 |
| -1.48122 | 0.024731 | 0.696603 | 0.692047 | 7676 |
| -1.38805 | 0.027437 | 0.713367 | 0.708702 | 2221 |
| -1.45681 | 0.031181 | 0.752804 | 0.747881 | 8250 |
| 1.253585 | 0.033756 | 0.757712 | 0.752756 | 5639 |
| -1.34744 | 0.03811  | 0.757712 | 0.752756 | 5075 |
| 1.324775 | 0.042573 | 0.799429 | 0.7942   | 4248 |
